1 **Designing Anti-Zika Virus Peptides Derived from Predicted Human-Zika Virus Protein-Protein Interactions**

2 Tom Kazmirchuk<sup>1</sup>, Kevin Dick<sup>2</sup>, Daniel. J. Burnside<sup>1</sup>, Brad Barnes<sup>2</sup>, Houman Moteshareie<sup>1</sup>, Maryam Hajikarimlou<sup>1</sup>,  
3 Katayoun Omid<sup>1</sup>, Duale Ahmed<sup>1,3</sup>, Andrew Low<sup>1</sup>, Clara Lettl<sup>1</sup>, Mohsen Hooshyar<sup>1</sup>, Andrew Schoenrock<sup>4</sup>, Sylvain  
4 Pitre<sup>4</sup>, Mohan Babu<sup>5</sup>, Edana Cassol<sup>3</sup>, Bahram Samanfar<sup>6</sup>, Alex Wong<sup>1</sup>, Frank Dehne<sup>3</sup>, James. R. Green<sup>2</sup>, and Ashkan  
5 Golshani<sup>1\*</sup>

6 <sup>1</sup> Department of Biology and Institute of Biochemistry, and Ottawa Institute of Systems Biology, Carleton  
7 University, Ottawa, Ontario. K1S 5B6

8 <sup>2</sup> Department of Systems and Computer Engineering, Carleton University, Ottawa, Ontario. K1S 5B6

9 <sup>3</sup> Department of Health Science, Carleton University, Ottawa, Ontario. K1S 5B6

10 <sup>4</sup> School of Computer Science, Carleton University, Ottawa, Ontario. K1S 5B6

11 <sup>5</sup> Department of Biochemistry, University of Regina, Regina, Saskatchewan S4S 0A2

12 <sup>6</sup> Agriculture and Agri-Food Canada, Ottawa Research and Development Centre (ORDC), Ottawa, Ontario. K1A  
13 0C6

14 \* Corresponding Author:

15 Email: [ashkan\\_golshani@carleton.ca](mailto:ashkan_golshani@carleton.ca)

16

17

18

19

20

21

22

23

24

25 **Keywords:** Synthetic peptide design; anti-Zika virus peptides; *In silico* drug design; protein-protein interaction  
26 prediction; host-virus interactions

27 **Acknowledgments**

28 This work was funded by the Natural Sciences and Engineering Research Council of Canada (NSERC). The authors  
29 claim no conflict of interest.

30 **Abstract**

31 The production of anti-Zika virus (ZIKV) therapeutics has become increasingly important as the propagation of the  
32 devastating virus continues largely unchecked. Notably, a causal relationship between ZIKV infection and  
33 neurodevelopmental abnormalities has been widely reported, yet a specific mechanism underlying impaired  
34 neurological development has not been identified. Here, we report on the design of several synthetic competitive  
35 inhibitory peptides against key pathogenic ZIKV proteins through the prediction of protein-protein interactions (PPIs).  
36 Often, PPIs between host and viral proteins are crucial for infection and pathogenesis, making them attractive targets  
37 for therapeutics. Using two complementary sequence-based PPI prediction tools, we first produced a comprehensive  
38 map of predicted human-ZIKV PPIs (involving 209 human protein candidates). We then designed several peptides  
39 intended to disrupt the corresponding host-pathogen interactions thereby acting as anti-ZIKV therapeutics. The data  
40 generated in this study constitute a foundational resource to aid in the multi-disciplinary effort to combat ZIKV  
41 infection, including the design of additional synthetic proteins.

42 **Introduction**

43 The Zika virus (ZIKV) is currently causing an ongoing pandemic, incurring considerable human impact. The rapid  
44 spread of the virus throughout the Western hemisphere has driven a significant accumulation of knowledge on ZIKV  
45 infection [1–4]. The ZIKV is a positive-sense single stranded RNA (+ssRNA) arbovirus from the genus *Flavivirus*  
46 [5,6]. A mature ZIKV virion contains a monopartite segment of +ssRNA 10,800 nucleotides enclosed in a capsid  
47 comprised of C-proteins and surrounded by a 50 nm spherical envelope. The membrane is comprised of membrane  
48 (M) and envelope (E) proteins arranged around the icosahedral capsid. The entire genome is translated in to a single  
49 polyprotein 3,419 amino acids in length, which is cleaved at ten locations to produce 11 individual proteins. Despite  
50 significant similarity to other *Flaviviridae*, the ZIKV results in some symptoms that are not associated with members  
51 of this viral family such as Dengue or Yellow Fever [7].

52 Host-virus protein-protein interactions (PPIs) are essential for viral infection and propagation as well as neuroinvasion  
53 [8]. The ZIKV appears to be highly neuroinvasive ( $6.5 \times 10^7$  viral RNA copies/mg of brain tissue [9]) and has been  
54 linked to numerous neurological complications including congenital brain abnormalities [10], infant microcephaly  
55 [11], Guillain-Barré syndrome [12], and meningoencephalitis [13]. Additionally, the ZIKV has been found to cause  
56 testicular atrophy [14], and may be spread as a sexually transmitted infection [15].

57 Investigating the host-virus interactome is an important step in identifying targets for novel anti-viral therapeutics  
58 [16]. Designing molecules, such as competitive peptides that interfere with these PPIs, can serve as efficient anti-viral  
59 therapies [17–19]. An early example of such anti-viral peptides is S6 — a 111 amino acid long fragment of human  
60 integrase interactor protein 1 which forms a PPI with HIV-1 integrase protein. S6 is shown to be an effective inhibitor  
61 of HIV-1 replication [20].

62 Global PPI prediction analysis is a robust method for probing the network of host-pathogen interactions that occur at  
63 various stages of the viral life cycle. Recognition of pertinent PPIs between host cell proteins and ZIKV components  
64 can guide the development of synthetic inhibitory peptides capable of disrupting such interactions. In the current study,  
65 we use this approach to generate a list of specific peptide sequences that might function in combating ZIKV infection.  
66 We believe that the overproduction of these synthetic peptides may interfere with several human-ZIKV PPIs, thus  
67 interrupting the ZIKV lifecycle. Considering that the World Health Organization has lifted the declaration of  
68 emergency for the ZIKV, shifting to threat management of the ZIKV is important as many mechanisms of  
69 pathogenesis are still unclear. The designed peptides provided here may therefore prove to be useful therapeutics  
70 against ZIKV infection, and could aid in overall ZIKV management.

## 71 **Materials and Methods**

### 72 **PIPE Prediction**

73 From the suite of available sequence-based methods, the Protein-Protein Interaction Prediction Engine (PIPE) excels  
74 in terms of specificity and execution time [21]. PIPE was developed to investigate short co-occurring polypeptide  
75 sequences between two proteins to determine their likelihood of interaction [22–24]. This likelihood of interaction is  
76 captured by two scores: PIPE-Score and Similarity-Weighted score (further described in Pitre *et al*, 2008) [24]. Two  
77 datasets were used to perform the PIPE analysis, the first using the entire set of known human-virus interactions  
78 (irrespective of virus type) and the second considering only interactions specific to the *Flaviviridae*, *Herpeviridae*,  
79 *Arteriviridae*, and *Coronaviridae* families. PIPE analysis was applied to all combinations of human-ZIKV (20,515  
80 human proteins, 11 ZIKV proteins). This resulted in a high confidence interaction network comprising the top-scoring  
81 0.02% of predicted PPIs including 45 human-ZIKV interactions corresponding to 23 unique human proteins. From  
82 these 23 candidates, we chose the top 17 to further investigate based on their apparent relevance to human health.

### 83 **DeNovo Prediction**

84 DeNovo is a host-virus PPI prediction tool tailored to predict cross-species protein interactions for newly identified  
85 viral organisms for which no interaction data are previously known [25]. Given the lack of known interactions for the  
86 ZIKV, DeNovo is well suited to this task. Similar to PIPE, DeNovo is a sequence-based method designed to leverage  
87 all currently known viral interaction data [25]. Unlike PIPE, however, DeNovo exploits the physiochemical properties  
88 of the human host's proteins to inform its predictions [25]. Learning these characteristics in the commonly shared  
89 human host, across all known host-viral interactions, enhances the discovery of interactions in the organism of interest.  
90 Determining the high confidence interactions as those with a probability of interaction greater than or equal to 80%  
91 resulted in 871 human-ZIKV interactions (0.38% of all putative PPIs) corresponding to 186 candidate human proteins  
92 (supplementary table 1). From these 186 candidates, we performed a literature search on eight due to their relevance  
93 to ZIKV infection to supplement the 17 from the PIPE analysis.

#### 94 **Prediction of PPI-Sites**

95 The list of PPIs generated from both methods can be used to inform the design of anti-ZIKV therapeutics by using  
96 peptide sequences from the predicted PPI site, which we refer to as the PPI-Site. We define the PPI-Site as the peptide  
97 sequence that is responsible for mediating the PPIs. When PIPE predicts an interaction between the two corresponding  
98 proteins, it will also report the predicted site of interaction using the amino acid sequences from both proteins. Using  
99 our previously reported PIPE output, we selected for PIPE's built-in peak height attribute, which we refer to as H.  
100 This is a measure of the number of times two corresponding sequence pairs co-occur within the annotated database of  
101 known PPI normalized to its expected occurrence. Selecting for H within our top 17 interactions produced 4 human-  
102 ZIKV PPI-Sites which we believe mediate the human-ZIKV PPIs.

#### 103 **Results**

104 To generate a list of anti-ZIKV peptides, we first predicted a network of PPIs between humans and the ZIKV. This  
105 was accomplished using two complementary computational modeling methods — each trained on currently known  
106 high-confidence human-viral interactions obtained from VirusMentha (incorporating the MINT, IntAct, DIP,  
107 MatrixDB, and BioGRID databases) [26]. The first method, PIPE, is proficient in host-virus interaction prediction and  
108 has successfully been used to predict novel interactions in humans, yeast, and most recently in viruses (Hepatitis C  
109 and HIV-1) [22,24,27,28]. The second method, DeNovo, is specifically designed for the prediction of interactions  
110 between proteins from a host and newly discovered viral organisms independent of prior known host-virus interactions  
111 [25]. Figure 1 highlights the ontology classification of the 209 human proteins believed to participate in human-ZIKV

112 PPIs based on their interaction profiles from both methods. In table 1, we report a total of 25 high priority human  
 113 protein (and their associated ZIKV interactors) from our list of 209 candidates based on their correlation to known  
 114 mechanisms of ZIKV infection, pathology, and symptomology. Of the eleven ZIKV proteins considered, the nine  
 115 interacting proteins reported in our results correspond to the structural proteins: Envelope (E), Capsid (C),  
 116 Premembrane (Pr), and Membrane (M), and the non-structural proteins: NS1, NS2A, NS3, NS4B, and the RNA-  
 117 dependent RNA polymerase NS5 proteins. These proteins not only highlight protein candidates for PPI-based  
 118 therapeutic design, but also they may provide potential mechanisms of ZIKV infection.

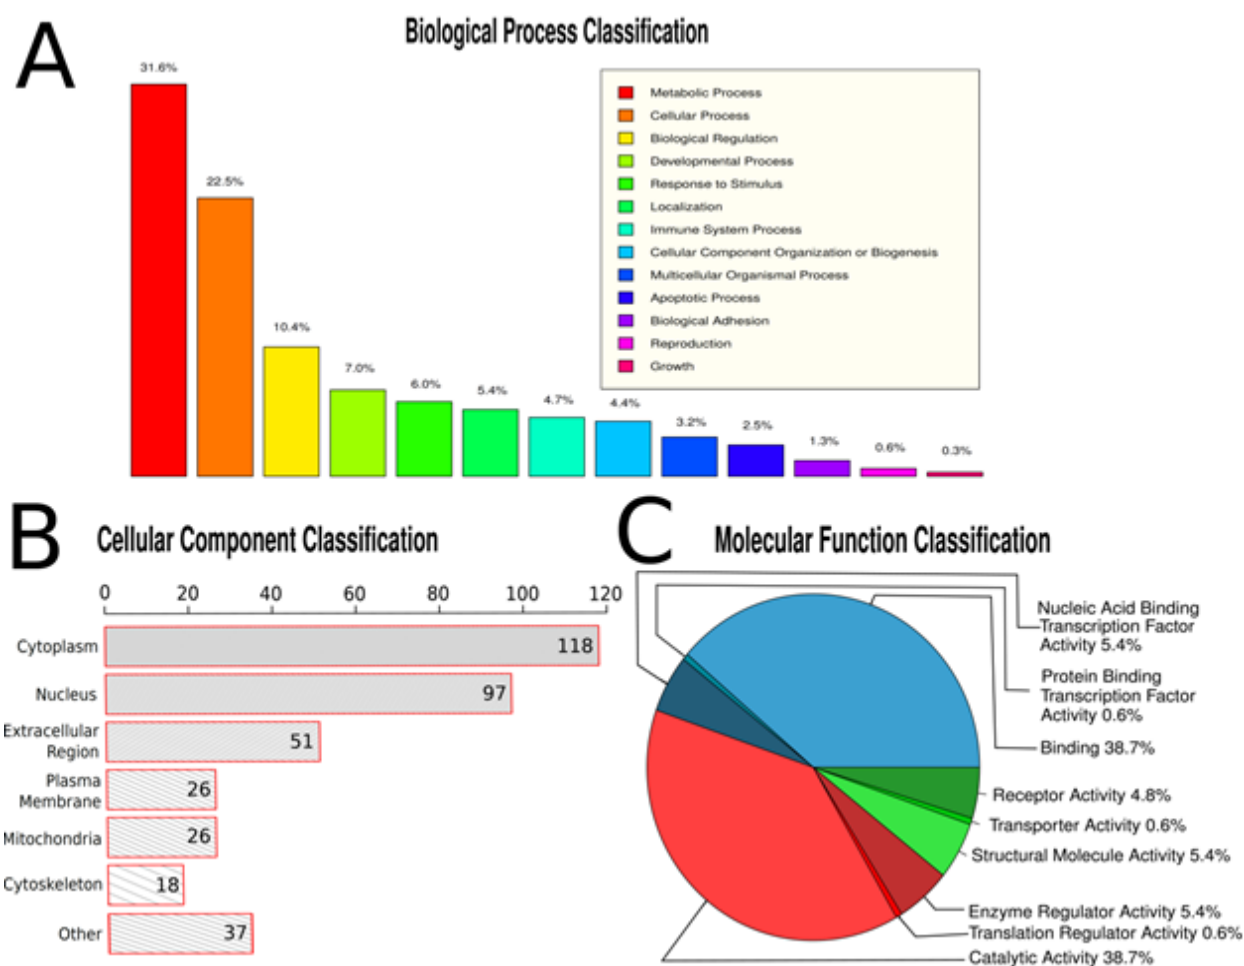

119  
 120 **Fig. 1** Human Protein Geneontology (GO) Classification using PANTHER GO-Slim. The evaluation of GO term  
 121 enrichment for 198 of the 209 high confidence human proteins (8 unmapped proteins were excluded) for biological  
 122 process (a), cellular component (b) and molecular function (c). Our list of 209 predicted high confidence human  
 123 proteins can be found in supplementary table 1

124

125 **Table 1: The 25 human protein candidates determined by PIPE (P) or DeNovo (N), respective ZIKV**  
 126 **interactors, function (F), associated disease phenotype (D), and supporting literature.**

| <i>Human Proteins</i> | <i>ZIKV Proteins</i> | <i>Function or Disease Phenotype</i>               | <i>Reference</i> |
|-----------------------|----------------------|----------------------------------------------------|------------------|
| ENO1 (P)              | NS5, NS3, NS1*, M*   | Affects cell proliferation, differentiation (F)    | [29–31]          |
| ENO2 (P)              | NS5, NS3, NS1*, M*   | Affects cell proliferation, differentiation (F)    | [29–31]          |
| ENO3 (P)              | NS3, NS1*, E*        | β-enolase deficiency (D)                           | [32]             |
| RNASET2 (P)           | NS3*                 | Microcephaly (D)                                   | [33–36]          |
| CALR3 (N)             | NS4B, M              | Male fertility, spermatogenesis, gamete fusion (F) | [37–39]          |
| NME1 (P)              | NS3                  | Induction of fibronectin (F)                       | [40]             |
| NME3 (P)              | NS5, NS3, M          | Cell motility in somatic cells, spermatozoa (D)    | [41]             |
| RNF151 (N)            | Pr, M                | Spermatogenesis (F)                                | [42]             |
| RNF125 (P)            | NS3                  | Regulation of HIV-1 replication (F)                | [43]             |
| FUNDC1 (P)            | NS3                  | Activates hypoxia-induced mitophagy (F)            | [44]             |
| BCLG (P)              | NS5, NS3, M          | Apoptosis factor (F)                               | [45]             |
| TRAF4 (P)             | NS5, NS3, M*         | Impaired neural crest development, folding (D)     | [46]             |
| MLPH (P)              | NS3                  | Griscelli syndrome (D)                             | [47]             |
| PIAS3 (P)             | NS3                  | SUMOylation of photoreceptors (F)                  | [48]             |
| CAMTA2 (P)            | NS5, NS3, M*, C*     | Decreased cardiac growth (D)                       | [49]             |
| AZI2 (P)              | NS5, NS3, M*         | Neurodevelopment (D)                               | [50]             |
| MATR3 (P)             | NS3                  | Cardiac development (F)                            | [51]             |
| CEP63 (P)             | NS5, NS3             | p53-dependent microcephaly (D)                     | [52]             |
| RIAM (P)              | NS5, NS3             | Leukocyte adhesion deficiency (D)                  | [53]             |
| DYX1C1 (N)            | NS4B, M              | Dyslexia (D)                                       | [54]             |
| SNAP25 (N)            | NS4B, M              | Huntington’s Disease (D)                           | [55]             |
| YWHAE (N)             | NS4B                 | Neurocognitive, Cerebrospinal fluid marker (D)     | [56]             |
| COX17 (N)             | NS4B, NS2A           | Cardiomyopathy, hepatic failure (D)                | [57]             |
| SPZ1 (N)              | NS4B, M              | Spermatogenesis (F)                                | [58]             |
| DNAJA1 (N)            | Pr, M                | Testis development, spermatogenesis (F)            | [59]             |

\* indicates interaction pairs also predicted for the Dengue virus.

127 From the list of 25 candidates, we here examine a subset of four proteins - RNASET2, ENO2, TRAF4, and CEP63 of  
128 particular interest for anti-ZIKV therapeutics. The first candidate, RNASET2, has been implicated in the occurrence  
129 of microcephaly [33] which is of special interest as no proposed mechanism exists linking the ZIKV to microcephaly.  
130 The second candidate, ENO2, has been linked to early brain development of humans [60], and may be useful in the  
131 study the pathogenesis of possible ZIKV-associated neurological disorders. TRAF4 is our third candidate and has  
132 been reported to be involved in TNF-receptor activity [46]. We believe that interfering with this receptor may affect  
133 ZIKV absorption and/or release. Finally, CEP63 has been previously implicated in p53 dependent microcephaly [52].  
134 Considering that microcephaly is a hallmark of ZIKV infection in infants [61], designing a therapeutic which interrupts  
135 a ZIKV interaction with CEP63 may prove useful. We identified the site of interactions (PPI-Site) between these  
136 proteins and their ZIKV interacting partners (table 2). Overproduction of these PPI-Sites via synthetic peptides can  
137 interfere with human-ZIKV PPIs, potentially acting as competitive inhibitors against the corresponding ZIKV protein.  
138 Consequently, PPI-Sites can provide the basis for effective anti-ZIKV therapeutics.

139

140

141

142

143

144

145

146

147

148

149

150

151

152 **Table 2: The amino acid sequence for Human-ZIKV PPIs. The peptides believed to**  
 153 **mediate the interactions are indicated. P1-P4 represent peptides that may function as anti-**  
 154 **ZIKV therapeutics. These peptides may interact with the corresponding ZIKV proteins**  
 155 **and prevent them from interacting with their human PPI partners.**

| <i>Human Protein</i>                                                                                                                                                                                                                                                                                                                                                                                                                                                                                                                                                                                                                                                                                                                                                                                               | <i>ZIKV Protein</i>                                                                                                                                                                                                                                                                                                                                                                                                                                                                                                                                                                                                                                                                                                                                                                                                                                                                                                                                                                                                                                                                                                                                                                                                                                                                                                                                                                                                                                                                                                                                                                                                                 | <i>PPI-Site; Human</i>                                                                                                                        | <i>PPI-Site; ZIKV</i>                                                                                                                                                                                                                                                                                                                                                                                                                                                                |
|--------------------------------------------------------------------------------------------------------------------------------------------------------------------------------------------------------------------------------------------------------------------------------------------------------------------------------------------------------------------------------------------------------------------------------------------------------------------------------------------------------------------------------------------------------------------------------------------------------------------------------------------------------------------------------------------------------------------------------------------------------------------------------------------------------------------|-------------------------------------------------------------------------------------------------------------------------------------------------------------------------------------------------------------------------------------------------------------------------------------------------------------------------------------------------------------------------------------------------------------------------------------------------------------------------------------------------------------------------------------------------------------------------------------------------------------------------------------------------------------------------------------------------------------------------------------------------------------------------------------------------------------------------------------------------------------------------------------------------------------------------------------------------------------------------------------------------------------------------------------------------------------------------------------------------------------------------------------------------------------------------------------------------------------------------------------------------------------------------------------------------------------------------------------------------------------------------------------------------------------------------------------------------------------------------------------------------------------------------------------------------------------------------------------------------------------------------------------|-----------------------------------------------------------------------------------------------------------------------------------------------|--------------------------------------------------------------------------------------------------------------------------------------------------------------------------------------------------------------------------------------------------------------------------------------------------------------------------------------------------------------------------------------------------------------------------------------------------------------------------------------|
| <p><b>RNASET2</b><br/>                     MRPAALRGALLGCLCLALLCLGGADKRLRDNHWEKKLIMVQ<br/>                     HWPETVCEKIQNDICRDPDYWTHIHLWPKDSEGCNRSWPFNL<br/>                     EEIKDLLPEMRAYPWDVIHSFPNRSRFWKHEWEKHGTCAAQV<br/>                     DALNSQKKYFGRSLELYRELDLNSVLLKLGKIPSYNYQVADF<br/>                     KDALARVYGVIPKIQCLPP<b>SQDEEVQTIGIELCLTKQDQQLQNC</b><br/>                     TEPGEQPSPKQEVWLANGAAESRGLRVCEDGPVFPYPPKTKKH</p>                                                                                                                                                                                                                                                                                                                                                             | <p><b>NS3</b><br/>                     SGALWDVPAPEVKKGETTDGVYRVMTRRLGSTQ<br/>                     VGVGVMQEGVFHTMWHVTKGAALRSRGEGLDPYW<br/>                     GDVKQDLVSYCGPWKLDAAW<b>DGLSEVQLLAVPPGE</b><br/>                     RARNIQTLPGFKTKDGDIGAVALDYDYPAGTSGSPILDK<br/>                     CGRVIGLYGNGVVIKNGSYVAITQGGKREETPVECF<br/>                     EPSMLKKKQLTVLDLHPGAGKTRRVLPEIVREAIKKR<br/>                     LRTVILAPTRVVAAEMEEALRGLPVRYMTTAVNVTH<br/>                     SGTEIVDLMCHATFTSRLQLPQIRVFNYNLIMDEAHFT<br/>                     DPSSIAARGYISTRVEMGEAAAIFFMTATPPGTRDAFPD<br/>                     SNSPIMDTEVEVPERAWSSGFDDVWTHSGKTVVWFVPS<br/>                     VRNGNEIAACLTAKGRVQLSRKTFETEFQKTKNQE<br/>                     WDFVITTDISEMGANFKADRVIDSRRCLKPVILDGERV<br/>                     ILAGPMPVTHASAAQRGRIGRPNPKPGDEYMYGGGC<br/>                     AETDEGHAHWLEARMLLDNIYLDGLIASLYRPEADK<br/>                     VAAIEGFEKLRTEQRKTFVELMKRGLDPVWLAYQVAS<br/>                     AGITYTDRRWCFDGTNTIMEDSVPAEIVWTKYGEKR<br/>                     VLKPRWMDARVCSDDHAALKSPKEFAAGKR</p>                                                                                                                                                                                                                                                                                                                                                                                                                                                                                                             | <p><b>P1</b><br/>                     (188-215)<br/> <b>SQDEEVQTIGIEL</b><br/> <b>CLTKQDQQLQNC</b><br/> <b>CTEP</b></p>                       | <p>(90-178)<br/> <b>DGLSEVQLLA</b><br/> <b>VPPGERARNI</b><br/> <b>QTLPGIFKTK</b><br/> <b>DGDIGAVALD</b><br/> <b>YPAGTSGSPI</b><br/> <b>LDKCGRVIGL</b><br/> <b>YGVNGVVIKNG</b><br/> <b>SYVSAITQGGK</b><br/> <b>REETPVEEC</b></p>                                                                                                                                                                                                                                                      |
| <p><b>ENO2</b><br/>                     MSIEKIWAREILDSRGNPTVEVDLYTAKGLFRAAVPSGAST<br/>                     GIYEAELELRDGDQRYLKGKVLKAVDHINSTIAP<b>ALISSGLS</b><br/> <b>VVEQEKLDNLMLELDGTENKSK</b>FGANAILGVSLAVCKAGA<br/>                     AERELPLRYHIAQLAGNSDLILPVPFNVINGGSHAGNKLA<br/>                     MQEFMILPVGAESFRDAMRLGAEVYHTLKGVIKDKYKGA<br/>                     TNVGDDEGGFAPNILENSEALELVEAIDKAGYTEKIVIGMDV<br/>                     AASEFVYRDGKYDLDFKSPDTPSRYYTGDQLGALYQDFVRDY<br/>                     PVVSIEDPFQDDWAASWKFATANVQIQVGDLLTVTNPKRIE<br/>                     RAVEEKACNCLLLKVNQIGSVTEAIQACKLAQENGWGMV<br/>                     SHRSGETEDTFIADLVVGLCTGQKGTGAPCRSERLAKYNQML<br/>                     RIEEELGDEARFAGHNFNRNPSVL</p>                                                         | <p><b>NS5</b><br/>                     GGGTGETLGEKWKARLNQMSALEFYYSKSGITEVC<br/>                     REEARRALKDGVATGGHVAVSRGSAKIRWLEERGYLEQ<br/>                     PYGKVVDLGCGRGGWSYYAATIRKVQEVYRGYTKGG<br/>                     PGHEEPMVLVQSYGWNVRLKSGVDVFHMAAEPDCLT<br/>                     LCDIGESSSSPEVEETRLRVLVSMVDWLEKRPAGFCI<br/>                     KVLCPYTSTMMETMERLQRRHGGGLVVRVPLCRNSTH<br/>                     EMYVWSGAKSNIKSVSSTTQLLLGRMDGPRRPVKYE<br/>                     EDVNLGSGTRAVASCAEAPNMKIIGRIERIRNEHAET<br/>                     WFLDENHPYRTWAYHGSYEAPTOGSASLVNGVVRLL<br/>                     LSKPVDVVTGVTGIAMTDTTPYQQRVFKKVDTRV<br/>                     PDPQEGTRQVMNIVSSWLWKELGKRRKRPVCTKEEFI<br/>                     NKVRSNAALGAIFEEEEKWKTAVEAVNDPRFWALVD<br/>                     REREHHLRGECHSCVYNMMGKREKKQGEFGKAKGS<br/>                     RAIWYMWLGARFLEFEALGFLNEDHWMGRENSSGGG<br/>                     VEGGLQLRGLYLEEMNRPAGGKMYADDTAGWDTR<br/>                     ISKFDLENEALITNQMEEGHRTLALAVIKYTYQNKVV<br/>                     KVLRPAGEGKTVMDIISRQDQRGSGQVVTYALNTFTN<br/>                     LVVQLIRNMEAEEVLEMQDLWLLRKEPKVTRWVLSQSN<br/>                     GWRDLKRMVAVSGDDCVVKPIDDRFAHALRFLNDMG<br/>                     KVRKDTQEWKPSGWSNWEVFPFCSHHFNKLYLKDQ<br/>                     RSIVVPCRHQDELIGRARVSPGAGWSIRETACLAKSYA<br/>                     QMWQLLYFHRRDLRLMANAICAVPVDVWVPTGRITW<br/>                     SHHGKGEWMTTIEDMLMVWNRVWIEENDHMEDKTPV<br/>                     TKWTDIPYLGKREDLWCGSLIGHRPRTTWAENIKDTPV<br/>                     NMVRRIGDEEKYMDYLSTQVRYLVEEGSTPGVL</p> | <p><b>P2</b><br/>                     (76-105)<br/> <b>ALISSGLSVV</b><br/> <b>EQEKLDNLM</b><br/> <b>ELDGTENKSK</b></p>                        | <p>(0-248)<br/> <b>GGGTGETLGEKWKA</b><br/> <b>RLNQMSALEFYYSK</b><br/> <b>SGITEVCREEARRAL</b><br/> <b>KDGVATGGHVAVSRG</b><br/> <b>SAKIRWLEERGYLEQ</b><br/> <b>PYGVDLGCGRGGWSYY</b><br/> <b>AATIRKVQEVYRGYTKG</b><br/> <b>PGHEEPMVLVQSYGWN</b><br/> <b>IVRLKSGVDVFHMAA</b><br/> <b>EPCDITLLCDIGESSSSPE</b><br/> <b>EETRLRVLVSMVDWLE</b><br/> <b>KRPGAFCIKVLCPYTST</b><br/> <b>MMETMERLQRRHGGGL</b><br/> <b>VRVPLCRNSTHEMYWV</b><br/> <b>SGAKSNIKSVSSTTQLL</b><br/> <b>LGRMDGPR</b></p> |
| <p><b>TRAF4</b><br/>                     MPGFYDFKLEKPKRRLLCLCGKMPREPQVSTCGHRFC<br/>                     TCLQELFSEGVPKCPEDQLPDYAKIYPPDELEVQVLGPIR<br/>                     CIHSEEGWWSGLRHLQHLAKNIEEFGRKSLDWEKQRLIYQ<br/>                     RDPLPAHLQHDPCPKRRLKCEFCGDFSGEAYESHEGMCPQE<br/>                     SVYENKCGARMRRLLAQHATSECPKRTQPCYCTKEFV<br/>                     FDTIQSHQYQCPRLPVAACPNQCGVGTVAREDLPGHLKDCSN<br/>                     TALVLCPFKDSGCKHRCPKLAAMARHVEESVPHLAM<b>MCAL</b><br/> <b>VSRQRELQELRRELEELVSGSDGVLI</b>WKIGSYGRRLQEAKA<br/>                     KPNLECFSPAFYTHKYGYKLQVSAFLNNGNSGEGTHLSLYIR<br/>                     VLPGAFDNLLEWPFARRVTFSLDQSDPGLAKPQHVTFTHFP<br/>                     DPNWKNFQKPGTWRGSLDESSLGFGYKPFISHQDIRKNRYVR<br/>                     DDAVFIRAAVELPRKILS</p> | <p><b>Membrane</b><br/>                     AVTLPSHSTRKQLQTRSQTWLESREYTKHLIKVENWIFR<br/>                     NPGFALVAVAIAWLLGSSTSQKVYLVYVLMILLI APAYS</p>                                                                                                                                                                                                                                                                                                                                                                                                                                                                                                                                                                                                                                                                                                                                                                                                                                                                                                                                                                                                                                                                                                                                                                                                                                                                                                                                                                                                                                                                           | <p><b>P3</b><br/>                     (453-482)<br/> <b>MCALVSRQRQ</b><br/> <b>ELQELRRELE</b><br/> <b>ELSVGSDGVL</b></p>                      | <p>(11-57)<br/> <b>RKLQTRSQT</b><br/> <b>WLESREYTK</b><br/> <b>HLIKVENWIF</b><br/> <b>RNPGFALVAV</b><br/> <b>AIAWLLGSST</b></p>                                                                                                                                                                                                                                                                                                                                                      |
| <p><b>CEP63</b><br/>                     MEALLEGIQNRHGGLTSCAEALQELMKQIDIMVAHKKS<br/>                     EWEGRTHALETCLKIREQELKSLRSQDLVTHKEVGMHLHQV<br/>                     EEHEKIQEMTMEYKQELKKLHEELCILKRSYEKLQKKQMR<br/>                     EFRGNTKNHREDRSEIERLAKIEEFGRKSLDWEKQRLIYQ<br/>                     QVSSLEAQRKALAEQSEIQAQLVNRKQKLESVELSSQSEIQH<br/>                     LSSKLERANDTICANELEIERLTMRVNDLVGTSMTVL<b>QEQQQ</b><br/> <b>KEEKLRESEKLEALQEEKRELKAALQSQENLIH</b>ARIQKEK<br/>                     LQEKVKATNTQHAVEAIRPREESLAEEKYTSQGGDLDSVL<br/>                     SQLNFTHTSEDLLQAEVTLLEGSLVSAATCKQLSQELMEKY<br/>                     BELKRMEEAHNNEYKAEIKLKEQILQGEQSYSSALEGMKME</p>                                                                                                             | <p><b>NS3</b><br/>                     SGALWDVPAPEVKKGETTDGVYRVMTRRLGSTQ<br/>                     VGVGVMQEGVFHTMWHVTKGAALRSRGEGLDPYW<br/>                     GDVKQDLVSYCGPWKLDAAW<b>DGLSEVQLLAVPPGE</b><br/>                     RARNIQTLPGFKTKDGDIGAVALDYDYPAGTSGSPILDK<br/>                     CGRVIGLYGNGVVIKNGSYVAITQGGKREETPVECF<br/>                     EPSMLKKKQLTVLDLHPGAGKTRRVLPEIVREAIKKR<br/>                     LRTVILAPTRVVAAEMEEALRGLPVRYMTTAVNVTH<br/>                     SGTEIVDLMCHATFTSRLQLPQIRVFNYNLIMDEAHFT<br/>                     DPSSIAARGYISTRVEMGEAAAIFFMTATPPGTRDAFPD<br/>                     SNSPIMDTEVEVPERAWSSGFDDVWTHSGKTVVWFVPS</p>                                                                                                                                                                                                                                                                                                                                                                                                                                                                                                                                                                                                                                                                                                                                                                                                                                                                                                                                                           | <p><b>P4</b><br/>                     (246-285)<br/> <b>QEQQQKEEKL</b><br/> <b>RESEKLEAL</b><br/> <b>QEEKRELKA</b><br/> <b>ALQSQENLIH</b></p> | <p>(90-178)<br/> <b>DGLSEVQLLAVPPG</b><br/> <b>ERARNIQTLPGFKTK</b><br/> <b>KDGDIGAVALDYPA</b><br/> <b>GTSGSPILDKCGRVI</b><br/> <b>GLYNGVVIKNGSY</b><br/> <b>VSAITQGGKREETPVE</b><br/> <b>EC</b></p>                                                                                                                                                                                                                                                                                  |



ISHLTQELHQRDITIASTKGSSDM EKRLRAEMQKAEDKAVE  
HKEILDQLES LKLENRHLESEMVMKLELGLHEAKEISLADLQEN  
YEALNKLVS ENQQLQKDLMN TKSQLEISTQMCKKQNDRIFKP  
THSRTTEFKNTEFKPTHGQHRHDGIKTEHYKTDLHSPRGQASD  
SINPM SRVLSPLSPQISPCSSTRSLTSYSLCKTHSLPSALDTNEA  
NFSDTMSESMNDQEEFISCSCLPVSPGLSIATRFLEEEELRSHHIL  
ERLDAHIEELKRESEKTVRQFT

VRNGNEIAACLTKAGKRVQLSRKTFETEFQKTKNQE  
WDFVITTDISEMGANFKADRVIDSRRLKPVILDGERV  
ILAGPMPVTHASAAQRRGRIGRNPKNKPGDEYMYGGGC  
AETDEGH AHWLEARM LLDNIYLQDGLIASLYRPEADK  
VAAIEGEFKLRTEQRKTFVELMKRGDLPVWLAYQVAS  
AGITYTDRRWCFDGTNTTIMEDSVPAEVWTKYGEKR  
VLKPRWMDARVCS DHAALKSFKEFAAGKR

(429-483)  
DSRRCLKPVILDGER  
VILAGPMPVTHASA  
AQRGRIGRNPKNKPG  
DEYMYGGGCA

## 156 Discussion

157 At the outset of this study, we sought to design anti-ZIKV therapeutics by identifying PPI-Sites from predicted human-  
158 ZIKV PPIs. By identifying these PPI-Sites on both the host and viral proteins, we provide a scaffold for the design of  
159 peptides which may inhibit ZIKV proteins or compete for binding to functionally-relevant targets. We employed two  
160 computational tools to predict PPIs, namely PIPE and DeNovo, and produced a priority list of testable protein  
161 interaction candidates which can be used as an important resource for multiple disciplines. In particular, the amino  
162 acid sequences identified here as being responsible for mediating interactions between human and ZIKV proteins can  
163 serve as the basis for engineering additional anti-ZIKV therapeutics.

164  
165 One of the primary public health concerns of the ZIKV infection has been occurrence of microcephaly in newborn  
166 children who are infected with the virus, or whose mothers have been infected. It is therefore possible that the virus is  
167 acting on the fetus during pregnancy, and affecting development. Our candidate, RNASET2 has been causally linked  
168 to a range of neurologic impairments including microcephaly, multifocal white matter lesions, and anterior temporal  
169 lobe subcortical cysts [33]. RNASET2 has been shown to localize to the lysosome, where it may function in RNA  
170 catabolism [62]. Zebrafish models have established that the loss of function in RNASET2 results in neuronal  
171 lysosomal disorder [63] congruent with findings in humans that have linked lysosomal disorders to the development  
172 of microcephaly [34]. Moreover, a loss of function mutation at amino acid 184 in the RNASET2 protein has been  
173 found in infants with cystic leukoencephalopathy leading to microcephaly, white matter lesions, and other temporal  
174 lobe deficiencies [33].

175 We predicted an interaction between the human protein RNASET2 and the ZIKV serine protease NS3. Interestingly,  
176 two *Flaviviridae* (Hepatitis C and Dengue) have been found to interact with human RNASET2 protein via their NS3  
177 protein *in vitro* [64]. The proteolytic domain of the ZIKV NS3 serine protease occurs at residues 1-175 [65,66], and  
178 RNASET2 is a proteolytic target at residue 24-25, which when cleaved produces a signaling peptide and the functional

179 domain [67]. Within this functional domain exists a serine at residue 188, congruent with our predicted site of  
180 interaction (PPI-Site, residue 188-215) and four residues downstream of the leukoencephalopathy-associated  
181 mutation. Interestingly, we predict that this site interacts with the proteolytic domain of NS3 (PPI-Site, residue 1-178)  
182 which may impact the functionality of RNASET2, as the functional domain would theoretically be cleaved in two  
183 (Figure 2). Disrupting this interaction via introduction of the identified PPI-Sites (P1) in excess could disrupt the ZIKV  
184 lifecycle in the cell. Alternatively, the binding of the PPI-Site to the proteolytic domain of NS3 can interfere with the  
185 mode of action of NS3 by deactivating its proteolytic domain in a PPI independent manner. In both cases, excess of  
186 P1 may interfere with ZIKV infection and hence may function as an effective anti-ZIKV therapy.

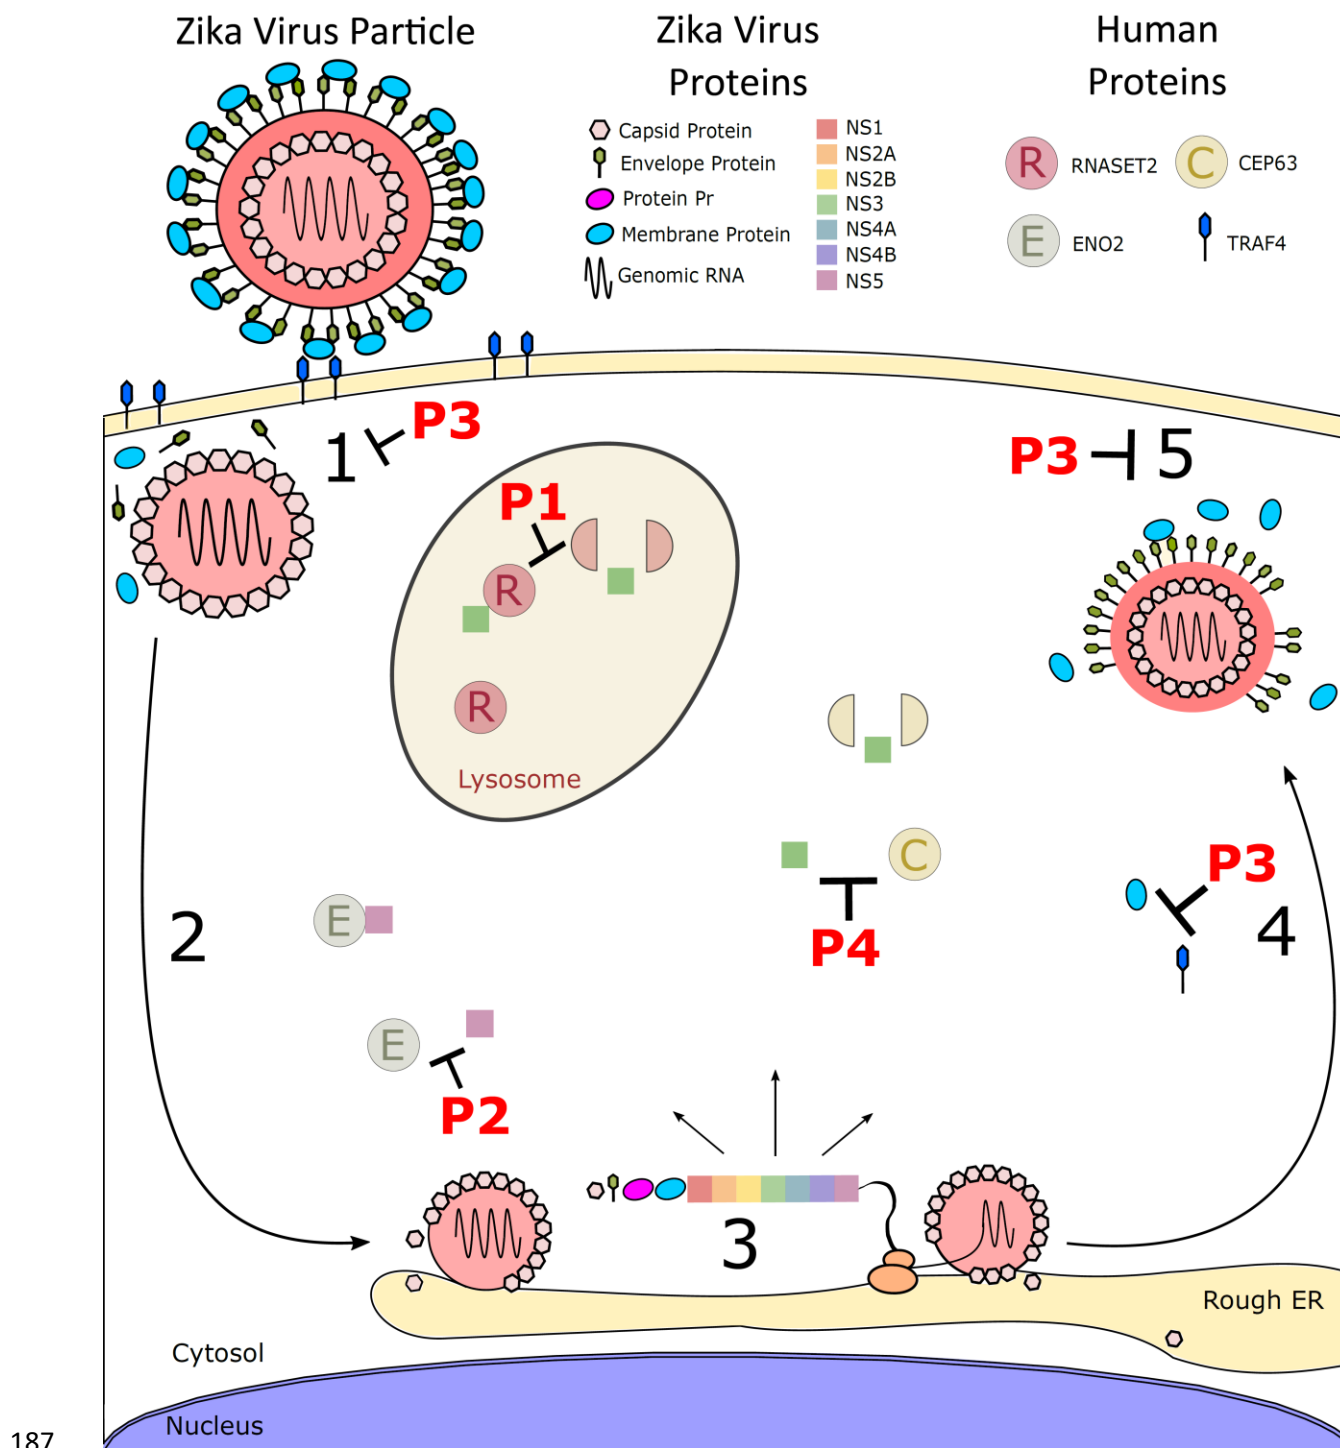

187  
 188 **Fig. 2** The ZIKV lifecycle within a human cell, and the peptide drugs that may interfere with its different steps. 1: The  
 189 ZIKV particle adsorbs into the human cell, possibly via TRAF4. P3 may interfere with this step. 2: The virion is  
 190 uncoated in the cytoplasm. 3: ZIKV RNA undergoes translation to produce the ZIKV polypeptide. P1, P2 and P4 are  
 191 designed to interfere with the activity of synthesized ZIKV polypeptides. 4: The immature virion is assembled and

192 moves to the cell membrane. 5: The ZIKV particle exits the host cell. P3 may also interfere with these last two steps.  
193 The ENO2 interaction with NS5 may impact neurodevelopment. This is the proposed site of P2 activity. The predicted  
194 interaction between RNASET2 and NS3, which we hypothesize to cleave the RNASET2 functional protein at amino  
195 acid 188 is the predicted site of P1 activity. The interaction between CEP63 and NS3 may result in a cleaved CEP63  
196 protein representing the proposed site of P4 activity. P1: SQDEEVQTIGIELCLTKQDQQLQNCTEP, P2:  
197 ALISSGLSVVEQEKLNDNLMLLELDGTENKSK, P3: MCALVSRQRQELQELRRELEELSVGSDGVL, and P4:  
198 QEQQKKEEKLRESEKLLLEALQEEKRELKAALQSQENLIHE.

199  
200 Our additional peptide sequences come from the interactions between ENO2-NS5, TRAF4-M, and CEP63-NS3, as  
201 seen in Figure 2. These three additional human protein candidates are all involved in neurodevelopment. Specifically,  
202 ENO2 (neuron-specific enolase) is important for normal brain development in humans [30]. A member of the enolase  
203 family, ENO2 promotes cell maturation in the central nervous system [68]. During early development, neuronal cells  
204 switch from ENO1 (non-neuronal enolase) to ENO2 in order to promote brain development [29] (Figure 2).  
205 Interestingly, a similar interaction was reported by Munoz *et al.* where they describe an interaction between the *Aedes*  
206 *aegypti* enolase and Dengue virus NS5 protein [69]. The predicted P2 peptide could potentially act as competitive  
207 inhibitor for the NS5 binding site. In this way, we predict that P2 will interrupt the lifecycle of the ZIKV in the human  
208 cell, thus acting as an effective therapeutic.

209 A previous study identified AXL as a receptor candidate that is active in the ZIKV lifecycle [70]. Although not a  
210 receptor, TRAF4 is an essential element for normal TNF receptor function as TRAFs have been previously identified  
211 as adaptor proteins for membrane receptors [71]. Therefore, it is possible that the ZIKV M protein may be impacting  
212 functionality of the TNF receptor via TRAF4, possibly increasing the function of TNF. Pertaining to  
213 neurodevelopment, it has been shown that TRAF4 is required for normal neural crest formation [46]. If the ZIKV M  
214 protein is binding to TRAF4 in a inhibitory manner, it is possible that TNF receptor functionality may be impacted  
215 [71], and that neural crest formation may be negatively affected [46]. The corresponding PPI-Site derived peptide for  
216 this interaction is P3. Overproducing this peptide may interfere with ZIKV adsorption/penetration and thus act as a  
217 promising anti-ZIKV therapeutic. As well, if the ZIKV M protein is inhibiting TRAF4 leading to impaired neural crest  
218 formation, inhibiting the M protein via P3 would be ideal.

219 Finally, a short motif within centrosomal protein CEP63 was predicted to interact with the ZIKV serine protease NS3.  
220 This is an important interaction as the loss of CEP63 in mice results in microcephaly [52]. It is therefore possible that  
221 the NS3 serine protease could act on one of the two serines within the interaction site on CEP63, rendering the protein  
222 dysfunctional. Overproduction of P4 may be able to saturate NS3 activity and prevent detrimental proteolytic cleavage  
223 of the endogenous target.

224 In this study, we have identified proteins and PPI-Sites of interest and designed a series of peptides that could be used  
225 to combat ZIKV infection. These peptides theoretically interfere with the activity of their corresponding ZIKV  
226 proteins by competing for their interacting partners. Additional manipulation and/or modification of the peptides  
227 designed in this study can lead to new anti-viral therapeutics with improved properties such as increased half-life or  
228 stronger binding properties. The information provided here can be used to develop and engineer viral therapeutics for  
229 the ZIKV, a process that has been achieved with other viruses and is proposed for the ZIKV [72,73].

## 230 **References**

231 [1] D.I. Thomas, T.M. Sharp, J. Torres, P.A. Armstrong, J. Munoz-Jordan, K.R. Ryff, A. Martinez-Quinones, J.  
232 Arias-Berrios, M. Mayshack, G.J. Garayalde, S. Saavedra, C.A. Luciano, M. Valencia-Prado, S. Waterman,  
233 B. Rivera-Garcia, Local Transmission of Zika Virus — Puerto Rico , November 23, 2015 - January 28, 2016,  
234 *Morb. Mortal. Wkly. Rep.* 65 (2016) 154–158.

235 [2] A.S. Fauci, D.M. Morens, Zika Virus in the Americas - Yet Another Arbovirus Threat, *N. Engl. J. Med.* 374  
236 (2016) 601–604.

237 [3] C. Zanluca, V.C.A. de Melo, A.L.P. Mosimann, G.I.V. dos Santos, C.N.D. dos Santos, K. Luz, First report of  
238 autochthonous transmission of Zika virus in Brazil., *Mem. Inst. Oswaldo Cruz.* 110 (2015) 569–572.  
239 doi:10.1590/0074-02760150192.

240 [4] G.S. Campos, A.C. Bandeira, S.I. Sardi, Zika virus outbreak, Bahia, Brazil, *Emerg. Infect. Dis.* 21 (2015)  
241 1885–1886. doi:10.32301/eid2110.150847.

242 [5] M.R. Duffy, T.-H. Chen, W.T. Hancock, A.M. Powers, J.L. Kool, R.S. Lanciotti, M. Pretrick, M. Marfel, S.  
243 Holzbauer, C. Dubray, L. Guillaumot, A. Griggs, M. Bel, A.J. Lambert, J. Laven, O. Kosoy, A. Panella, B.J.  
244 Biggerstadd, M. Fischer, E.B. Hayes, Zika Virus Outbreak on Yap Island, Federated States of Micronesia, *N.*  
245 *Engl. J. Med.* 360 (2009) 2536–2543.

- 246 [6] D. Musso, E.J. Nilles, V.M. Cao-Lormeau, Rapid spread of emerging Zika virus in the Pacific area, *Clin.*  
247 *Microbiol. Infect.* 20 (2014) O595–O596. doi:10.1111/1469-0691.12707.
- 248 [7] S. Ekins, J. Liebler, B.J. Neves, W.G. Lewis, M. Coffee, R. Bienstock, C. Southan, C.H. Andrade, Illustrating  
249 and homology modeling the proteins of the Zika virus., *F1000Research.* 5 (2016) 1–20.  
250 doi:10.12688/f1000research.8213.2.
- 251 [8] M. Oglesbee, S. Niewiesk, Measles virus neurovirulence and host immunity., *Future Virol.* 6 (2011) 85–99.  
252 doi:10.2217/fvl.10.70.
- 253 [9] J. Mlakar, M. Korva, N. Tul, M. Popović, M. Poljšak-Prijatelj, J. Mraz, M. Kolenc, K. Resman Rus, T.  
254 Vesnaver Vipotnik, V. Fabjan Vodusek, A. Vizjak, J. Pižem, M. Petrovec, T. Avšič Županc, Zika Virus  
255 Associated with Microcephaly., *N. Engl. J. Med.* 374 (2016) 951–8. doi:10.1056/NEJMoa1600651.
- 256 [10] P. Gérardin, V.-M. Cao-Lormeau, D. Musso, P. Desprès, M. Besnard, Zika rash and increased risk of  
257 congenital brain abnormalities, *Lancet.* 389 (2017) 151–152. doi:10.1016/S0140-6736(17)30014-4.
- 258 [11] M.A. Johansson, L. Mier-y-Teran-Romero, J. Reefhuis, S.M. Gilboa, S.L. Hills, Zika and the Risk of  
259 Microcephaly, *N. Engl. J. Med.* 375 (2016) 1–4. doi:10.1056/NEJMp1002530.
- 260 [12] T. dos Santos, A. Rodriguez, M. Almiron, A. Sanhueza, P. Ramon, W.K. de Oliveira, G.E. Coelho, R. Badaro,  
261 J. Cortez, M. Ospina, R. Pimentel, R. Masis, F. Hernandez, B. Lara, R. Montoya, B. Jubithana, A. Melchor,  
262 A. Alvarez, S. Aldighieri, C. Dye, M.A. Espinal, Zika Virus and the Guillain – Barré Syndrome — Case Series  
263 from Seven Countries, *N. Engl. J. Med.* 375 (2016) 1598–1601. doi:10.1056/NEJMc1609015.
- 264 [13] G. Carteaux, M. Marquart, A. Bedet, D. Contou, P. Brugieres, S. Fourati, L. Cleret de Langavant, T. de  
265 Broucker, C. Brun-Buisson, I. Leparç-Goffart, A.M. Dessap, Zika Virus Associated with  
266 Meningoencephalitis, *N. Engl. J. Med.* 374 (2016) 1592–1595. doi:10.1056/NEJMc1600179.
- 267 [14] R. Uraki, J. Hwang, K.A. Jurado, S. Householder, L.J. Yockey, A.K. Hastings, R.J. Homer, A. Iwasaki, E.  
268 Fikrig, Zika virus causes testicular atrophy, *Sci. Adv.* 3 (2017) e1602899. doi:10.1126/sciadv.1602899.
- 269 [15] E. D’Ortenzio, S. Matheron, X. de Lamballerie, B. Hubert, G. Piorkowski, M. Maquart, D. Descamps, F.  
270 Damond, Y. Yazdanpanah, I. Leparç-Goffart, Evidence of Sexual Transmission of Zika Virus, *N. Engl. J.*

- 271 Med. 374 (2016) 2195–2198. doi:10.1056/NEJMc1604449.
- 272 [16] B. de Chassey, L. Meyniel-Schicklin, J. Vonderscher, P. André, V. Lotteau, Virus-host interactomics: new  
273 insights and opportunities for antiviral drug discovery., *Genome Med.* 6 (2014) 115. doi:10.1186/s13073-014-  
274 0115-1.
- 275 [17] J.A. Esté, A. Telenti, HIV entry inhibitors, *Lancet.* 370 (2007) 81–88. doi:10.1016/S0140-6736(07)61052-6.
- 276 [18] N. London, B. Raveh, O. Schueler-Furman, Druggable protein-protein interactions - from hot spots to hot  
277 segments, *Curr. Opin. Chem. Biol.* 17 (2013) 952–959. doi:10.1016/j.cbpa.2013.10.011.
- 278 [19] N. Schormann, C.I. Sommers, M.N. Prichard, K.A. Keith, J.W. Noah, M. Nuth, R.P. Ricciardi, D.  
279 Chattopadhyay, Identification of protein-protein interaction inhibitors targeting vaccinia virus processivity  
280 factor for development of antiviral agents, *Antimicrob. Agents Chemother.* 55 (2011) 5054–5062.  
281 doi:10.1128/AAC.00278-11.
- 282 [20] E. Yung, M. Sorin, a Pal, E. Craig, a Morozov, O. Delattre, J. Kappes, D. Ott, G. V Kalpana, Inhibition of  
283 HIV-1 virion production by a transdominant mutant of integrase interactor 1., *Nat. Med.* 7 (2001) 920–6.  
284 doi:10.1038/90959.
- 285 [21] Y. Park, Critical assessment of sequence-based protein-protein interaction prediction methods that do not  
286 require homologous protein sequences., *BMC Bioinformatics.* 10 (2009) 419. doi:10.1186/1471-2105-10-419.
- 287 [22] S. Pitre, F. Dehne, A. Chan, J. Cheetham, A. Duong, A. Emili, M. Gebbia, J. Greenblatt, M. Jessulat, N.  
288 Krogan, X. Luo, A. Golshani, PIPE: a protein-protein interaction prediction engine based on the re-occurring  
289 short polypeptide sequences between known interacting protein pairs., *BMC Bioinformatics.* 7 (2006) 365.  
290 doi:10.1186/1471-2105-7-365.
- 291 [23] S. Pitre, M. Hooshyar, A. Schoenrock, B. Samanfar, M. Jessulat, J.R. Green, F. Dehne, A. Golshani, Short  
292 Co-occurring Polypeptide Regions Can Predict Global Protein Interaction Maps, *Sci. Rep.* 2 (2012) 1–10.  
293 doi:10.1038/srep00239.
- 294 [24] S. Pitre, C. North, M. Alamgir, M. Jessulat, A. Chan, X. Luo, J.R. Green, M. Dumontier, F. Dehne, A.  
295 Golshani, Global investigation of protein-protein interactions in yeast *Saccharomyces cerevisiae* using re-

- 296 occurring short polypeptide sequences, *Nucleic Acids Res.* 36 (2008) 4286–4294. doi:10.1093/nar/gkn390.
- 297 [25] F. Eid, M. Elhefnawi, L.S. Heath, Sequence analysis DeNovo: virus-host sequence-based protein – protein  
298 interaction prediction, *Bioinformatics.* 32 (2016) 1144–1150. doi:10.1093/bioinformatics/btv737.
- 299 [26] A. Calderone, L. Licata, G. Cesareni, VirusMentha: A new resource for virus-host protein interactions,  
300 *Nucleic Acids Res.* 43 (2015) D588–D592. doi:10.1093/nar/gku830.
- 301 [27] A. Schoenrock, F. Dehne, J.R. Green, A. Golshani, S. Pitre, MP-PIPE: a massively parallel protein-protein  
302 interaction prediction engine, *Proc. Int. Conf. Supercomput.* (2011) 327–337. doi:10.1145/1995896.1995946.
- 303 [28] A. Amos-Binks, C. Patulea, S. Pitre, A. Schoenrock, Y. Gui, J.R. Green, A. Golshani, F. Dehne, Binding site  
304 prediction for protein-protein interactions and novel motif discovery using re-occurring polypeptide  
305 sequences., *BMC Bioinformatics.* 12 (2011) 225. doi:10.1186/1471-2105-12-225.
- 306 [29] D.E. Schmechel, M.W. Brightman, P.J. Marangos, Neurons switch from non-neuronal enolase to neuron-  
307 specific enolase during differentiation, *Brain Res.* 190 (1980) 195–214. doi:10.1016/0006-8993(80)91169-5.
- 308 [30] P.S. Eriksson, E. Perfilieva, T. Bjork-Eriksson, A.-M. Alborn, C. Nordborg, D.A. Peterson, F.H. Gage,  
309 Neurogenesis in the adult human hippocampus, *Nat. Med.* 4 (1998) 1313–1317.
- 310 [31] E. Gould, A.J. Reeves, M. Fallah, P. Tanapat, C.G. Gross, E. Fuchs, Hippocampal neurogenesis in adult Old  
311 World primates, *PNAS.* 96 (1999) 5263–5267.
- 312 [32] G.P. Comi, F. Fortunato, S. Lucchiari, A. Bordoni, A. Prella, S. Jann, A. Keller, P. Ciscato, S. Galbiati, L.  
313 Chiveri, Y. Torrente, G. Scarlato, N. Bresolin, B-Enolase Deficiency, a New Metabolic Myopathy of Distal  
314 Glycolysis, *Ann. Neurol.* 50 (2001) 202–207. doi:10.1002/ana.1095.
- 315 [33] M. Henneke, S. Diekmann, A. Ohlenbusch, J. Kaiser, V. Engelbrecht, A. Kohlschütter, R. Krätzner, M.  
316 Madruga-Garrido, M. Mayer, L. Opitz, D. Rodriguez, F. Rüschenhoff, J. Schumacher, H. Thiele, S. Thoms,  
317 R. Steinfeld, P. Nürnberg, J. Gärtner, RNASET2-deficient cystic leukoencephalopathy resembles congenital  
318 cytomegalovirus brain infection., *Nat. Genet.* 41 (2009) 773–775. doi:10.1038/ng.398.
- 319 [34] O. Staretz-Chacham, T.C. Lang, M.E. LaMarca, D. Kranewich, E. Sidransky, Lysosomal Storage Disorders  
320 in the Newborn, *Pediatrics.* 123 (2009) 1191–1207. doi:10.1542/peds.2008-0635.Lysosomal.



- 321 [35] D. Tonduti, S. Orcesi, E.M. Jenkinson, I. Dorboz, F. Renaldo, C. Panteghini, G.I. Rice, M. Henneke, J.H.  
322 Livingston, M. Elmaleh, L. Burglen, M.A.A.P. Willemsen, L. Chiapparini, B. Garavaglia, D. Rodriguez, O.  
323 Boespflug-Tanguy, I. Moroni, Y.J. Crow, Clinical, radiological and possible pathological overlap of cystic  
324 leukoencephalopathy without megalencephaly and Aicardi-Goutieres syndrome, *Eur. J. Paediatr. Neurol.* 20  
325 (2016) 604–610. doi:10.1016/j.ejpn.2016.03.009.
- 326 [36] N. Haud, F. Kara, S. Diekmann, M. Henneke, J.R. Willer, M.S. Hillwig, R.G. Gregg, G.C. Macintosh, J.  
327 Gärtner, A. Alia, A.F.L. Hurlstone, rnaset2 mutant zebrafish model familial cystic leukoencephalopathy and  
328 reveal a role for RNase T2 in degrading ribosomal RNA., *Proc. Natl. Acad. Sci. U. S. A.* 108 (2010) 1099–  
329 1103. doi:10.1073/pnas.1009811107.
- 330 [37] K. Tokuhira, Y. Satouh, K. Nozawa, A. Isotani, Y. Fujihara, Calreticulin is required for development of the  
331 cumulus oocyte complex and female fertility, *Sci. Rep.* 5 (2015) 1–10. doi:10.1038/srep14254.
- 332 [38] S. Irie, J. Nakamura, Y. Miyagawa, A. Tsujimura, H. Okuda, K. Yamamoto, S. Fukuhara, I. Yoshioka, K.  
333 Hiroshi, Y. Matsuoka, T. Takao, N. Nonomura, M. Ikawa, K. Tokuhira, M. Okabe, T. Shibata, K. Fujimoto,  
334 M. Wada, H. Tanaka, Primary Screening of Single Nucleotide Polymorphisms in Human Calreticulin 3 (  
335 CALR3 ), *Open Androl. J.* 3 (2011) 30–35.
- 336 [39] M.D. Dun, R.J. Aitken, B. Nixon, The role of molecular chaperones in spermatogenesis and the post-testicular  
337 maturation of mammalian spermatozoa, *Hum. Reprod. Update.* 0 (2012) 1–16. doi:10.1093/humupd/dms009.
- 338 [40] M. Novak, M.K. Leonard, X.H. Yang, A. Korluru, A.M. Belkin, D.M. Kaetzel, Metastasis Suppressor NME1  
339 Regulated Melanoma Cell Morphology, Self-Adhesion and Motility via Induction of Fibronectin Expression,  
340 *Exp. Dermatol.* 24 (2015) 455–461. doi:10.1111/exd.12697.Metastasis.
- 341 [41] H. Bauer, S. Schindler, Y. Charron, J. Willert, B. Kusecek, B.G. Herrmann, The nucleoside diphosphate kinase  
342 gene nme3 acts as quantitative trait locus promoting non-mendelian inheritance, *PLoS Genet.* 8 (2012) 1–9.  
343 doi:10.1371/journal.pgen.1002567.
- 344 [42] H. Nian, C. Fan, S. Liao, Y. Shi, K. Zhang, Y. Liu, C. Han, RNF151, a testis-specific RING finger protein,  
345 interacts with dysbindin, *Arch. Biochem. Biophys.* 465 (2007) 157–163. doi:10.1016/j.abb.2007.05.013.

- 346 [43] S. Shoji-Kawata, Q. Zhong, M. Kameoka, Y. Iwabu, S. Sapsutthipas, R.B. Luftig, K. Ikuta, The RING finger  
347 ubiquitin ligase RNF125/TRAC-1 down-modulates HIV-1 replication in primary human peripheral blood  
348 mononuclear cells, *Virology*. 368 (2007) 191–204. doi:10.1016/j.virol.2007.06.028.
- 349 [44] L. Liu, D. Feng, G. Chen, M. Chen, Q. Zheng, P. Song, Q. Ma, C. Zhu, R. Wang, W. Qi, L. Huang, P. Xue,  
350 B. Li, X. Wang, H. Jin, J. Wang, F. Yang, P. Liu, Y. Zhu, S. Sui, Q. Chen, Q. Chen, Mitochondrial outer-  
351 membrane protein FUNDC1 mediates hypoxia-induced mitophagy in mammalian cells, *Nat. Cell Biol.* 14  
352 (2012). doi:10.1038/ncb2422.
- 353 [45] W. Hu, J.J. Kavanagh, Anticancer therapy targeting the apoptotic pathway., *Lancet Oncol.* 4 (2003) 721–9.  
354 doi:10.1016/S1470-2045(03)01277-4.
- 355 [46] T. Kalkan, Y. Iwasaki, C.Y. Park, G.H. Thomsen, Tumor Necrosis Factor-Receptor – associated Factor-4 Is  
356 a Positive Regulator of Transforming Growth Factor- B Signaling That Affects Neural Crest Formation, *Mol.*  
357 *Biol. Cell.* 20 (2009) 3436–3450. doi:10.1091/mbc.E08.
- 358 [47] M. Van Gele, P. Dynoodt, J. Lambert, Griscelli syndrome: A model system to study vesicular trafficking,  
359 *Pigment Cell Melanoma Res.* 22 (2009) 268–282. doi:10.1111/j.1755-148X.2009.00558.x.
- 360 [48] A. Onishi, G. Peng, C. Hsu, U. Alexis, S. Chen, S. Blackshaw, Pias3-dependent SUMOylation directs rod  
361 photoreceptor development, *Neuron.* 61 (2010) 234–246. doi:10.1016/j.neuron.2008.12.006.Pias3-dependent.
- 362 [49] K. Song, J. Backs, J. McAnally, X. Qi, R.D. Gerard, J.A. Richardson, J.A. Hill, R. Bassel-Duby, E.N. Olson,  
363 The Transcriptional Coactivator CAMTA2 Stimulates Cardiac Growth by Opposing Class II Histone  
364 Deacetylases, *Cell.* 125 (2006) 453–466. doi:10.1016/j.cell.2006.02.048.
- 365 [50] M. Fukasaka, D. Ori, T. Kawagoe, S. Uematsu, K. Maruyama, T. Okazaki, T. Satoh, T. Kozaki, T. Imamura,  
366 M. Takashi, S. Takashi, S. Akira, O. Takeuchi, E. Alerts, Critical Role of AZI2 in GM-CSF – Induced  
367 Dendritic Cell Differentiation, *J. Immunol.* 190 (2013) 5702–5711. doi:10.4049/jimmunol.1203155.
- 368 [51] F. Quintero-Rivera, Q.J. Xi, K.M. Keppler-Noreuil, J.H. Lee, A.W. Higgins, R.M. Anchan, A.E. Roberts, I.S.  
369 Seong, X. Fan, K. Lage, L.Y. Lu, J. Tao, X. Hu, R. Berezney, B.D. Gelb, A. Kamp, I.P. Moskowitz, R. V.  
370 Lacro, W. Lu, C.C. Morton, J.F. Gusella, R.L. Maas, MATR3 disruption in human and mouse associated with

- 371 bicuspid aortic valve, aortic coarctation and patent ductus arteriosus, *Hum. Mol. Genet.* 24 (2015) 2375–2389.  
372 doi:10.1093/hmg/ddv004.
- 373 [52] M. Marjanović, C. Sánchez-Huertas, B. Terré, R. Gómez, J.F. Scheel, S. Pacheco, P.A. Knobel, A. Martínez-  
374 Marchal, S. Aivio, L. Palenzuela, U. Wolfrum, P.J. McKinnon, J.A. Suja, I. Roig, V. Costanzo, J. Lüders,  
375 T.H. Stracker, CEP63 deficiency promotes p53-dependent microcephaly and reveals a role for the centrosome  
376 in meiotic recombination., *Nat. Commun.* 6 (2015) 7676. doi:10.1038/ncomms8676.
- 377 [53] D.A. Calderwood, The Rap1-RIAM pathway prefers B 2 integrins, *Immunobiology.* 126 (2015) 2658–2660.  
378 doi:10.1182/blood-2015-09-668962.
- 379 [54] F. Dahdouh, H. Anthoni, I. Tapia-pa, M. Peyrard-Janvid, G. Schulte-ko, A. Warnke, H. Remschmidt, A.  
380 Ziegler, J. Kere, B. Muller-Myhsok, M.M. Nothen, J. Schumacher, M. Zucchelli, Further evidence for  
381 DYX1C1 as a susceptibility factor for dyslexia, *Psychiatr. Genet.* 19 (2007) 59–63.  
382 doi:10.1097/YPG.0b013e32832080e1.
- 383 [55] R. Smith, P. Klein, Y. Koc-Schmitz, H.J. Waldvogel, R.L.M. Faull, P. Brundin, M. Plomann, J.Y. Li, Loss of  
384 SNAP-25 and rabphilin 3a in sensory-motor cortex in Huntington’s disease, *J. Neurochem.* 103 (2007) 115–  
385 123. doi:10.1111/j.1471-4159.2007.04703.x.
- 386 [56] D. Morales, R. Hechavarria, V. Wojna, S.F. Acevedo, YWHAE/14-3-3ε: a A potential novel genetic risk  
387 factor and CSF biomarker for HIV neurocognitive impairment, *J. Neurovirol.* 19 (2013) 471–478.  
388 doi:10.1007/s13365-013-0200-z.
- 389 [57] I. Hamza, J.D. Gitlin, Copper chaperones for cytochrome c oxidase and human disease, *J. Bioenerg.*  
390 *Biomembr.* 34 (2002) 381–388. doi:10.1023/A:1021254104012.
- 391 [58] S.H. Hsu, H.M. Hsieh-Li, H. Li, Dysfunctional spermatogenesis in transgenic mice overexpressing bHLH-  
392 Zip transcription factor, Spz1, *Exp. Cell Res.* 294 (2004) 185–198. doi:10.1016/j.yexcr.2003.10.029.
- 393 [59] Y. Hu, Z. Zhou, X. Huang, M.I.N. Xu, L.I. Lu, Z. Xu, J. Li, J. Sha, Expression of a novel DnaJA1 alternative  
394 splicing in human testis and sperm, *Int. J. Androl.* 27 (2004) 343–349.
- 395 [60] P.S. Eriksson, E. Perfilieva, T. Björk-Eriksson, a M. Alborn, C. Nordborg, D. a Peterson, F.H. Gage,

- 396 Neurogenesis in the adult human hippocampus., *Nat. Med.* 4 (1998) 1313–1317. doi:10.1038/3305.
- 397 [61] S.A. Rasmussen, D.J. Jamieson, M.A. Honein, L.R. Petersen, Zika Virus and Birth Defects — Reviewing the  
398 Evidence for Causality, *N. Engl. J. Med.* 274 (2016) 1981–1987. doi:10.1056/NEJMSr1604338.
- 399 [62] L. Vidalino, L. Monti, A. Haase, A. Moro, F. Acquati, R. Taramelli, P. Macchi, Intracellular trafficking of  
400 RNASET2, a novel component of P-bodies, *Biol. Cell.* 104 (2012) 13–21. doi:10.1111/boc.201100092.
- 401 [63] N. Haud, F. Kara, S. Diekmann, M. Henneke, J.R. Willer, M.S. Hillwig, R.G. Gregg, G.C. MacIntosh, J.  
402 Gärtner, A. Alia, A.F.L. Hurlstone, rnaset2 mutant zebra fish model familial cystic leukoencephalopathy and  
403 reveal a role for RNase T2 in degrading ribosomal RNA, *PNAS.* (2010) 1–5. doi:10.1073/pnas.1009811107.
- 404 [64] P.T. Dolan, C. Zhang, S. Khadka, V. Arumugaswami, A.D. Vangeloff, N.S. Heaton, S. Sahasrabudhe, G.  
405 Randall, R. Sun, D.J. LaCount, Identification and comparative analysis of hepatitis C virus-host cell protein  
406 interactions., *Mol. Biosyst.* 9 (2013) 3199–209. doi:10.1039/c3mb70343f.
- 407 [65] J. Wu, A.K. Bera, R.J. Kuhn, J.L. Smith, Structure of the Flavivirus Helicase: Implications for Catalytic  
408 Activity, Protein Interactions, and Proteolytic Processing, *J. Virol.* 79 (2005) 10268–10277.  
409 doi:10.1128/JVI.79.16.10268.
- 410 [66] S. Awasthi, Zika Virus: Prospects for the Development of Vaccine and Antiviral Agents *Antivirals &*  
411 *Antiretrovirals, J. Antivirals Antiretrovir.* 8 (2016) 61–63. doi:10.4172/jaa.1000e130.
- 412 [67] P. Campomenosi, S. Salis, C. Lindqvist, D. Mariani, T. Nordström, F. Acquati, R. Taramelli, Characterization  
413 of RNASET2, the first human member of the Rh/T2/S family of glycoproteins, *Arch. Biochem. Biophys.* 449  
414 (2006) 17–26. doi:10.1016/j.abb.2006.02.022.
- 415 [68] E.A. Konstantinou, K. Venetsanou, A.P. Mitsos, K.V. Mamoura, E.E. Theodosopoulou, T. Fotis, G.  
416 Baltopoulos, Neuron Specific Enolase (NSE): A Valuable Prognostic Factor of Central Nervous System  
417 Dysfunction Following Cardiac Surgery, *Br. J. Anaesth. Recover. Nurs.* 9 (2008) 22–28.  
418 doi:10.1017/S1742645608000132.
- 419 [69] M.D.L. Muñoz, G. Limón-Camacho, R. Tovar, A. Diaz-Badillo, G. Mendoza-Hernández, W.C. Black,  
420 Proteomic identification of dengue virus binding proteins in *Aedes aegypti* mosquitoes and *Aedes albopictus*

- 421 cells, *Biomed Res. Int.* 2013 (2013) 1–11. doi:10.1155/2013/875958.
- 422 [70] T.J. Nowakowski, A.A. Pollen, E. Di Lullo, C. Sandoval-Espinosa, M. Bershteyn, A.R. Kriegstein, Expression  
423 analysis highlights AXL as a candidate zika virus entry receptor in neural stem cells, *Cell Stem Cell.* 18 (2016)  
424 591–596. doi:10.1016/j.stem.2016.03.012.
- 425 [71] R.H. Arch, R.W. Gedrich, C.B. Thompson, Tumor necrosis factor receptor-associated factors (TRAFs) - a  
426 family of adaptor that regulates life and death, *Genes Dev.* 12 (1998) 2821. doi:10.1101/gad.12.18.2821.
- 427 [72] S. Khadka, A.D. Vangeloff, C. Zhang, P. Siddavatam, N.S. Heaton, L. Wang, R. Sengupta, S. Sahasrabudhe,  
428 G. Randall, M. Gribskov, R.J. Kuhn, R. Perera, D.J. LaCount, A physical interaction network of dengue virus  
429 and human proteins, *Mol. Cell. Proteomics.* 10 (2011) M111.012187. doi:10.1074/mcp.M111.012187.
- 430 [73] C. Overend, L. Yuan, J. Peccoud, The synthetic futures of vesicular stomatitis virus, *Trends Biotechnol.* 30  
431 (2012) 497–498. doi:10.1016/j.tibtech.2012.06.002.

# A Biological Process Classification

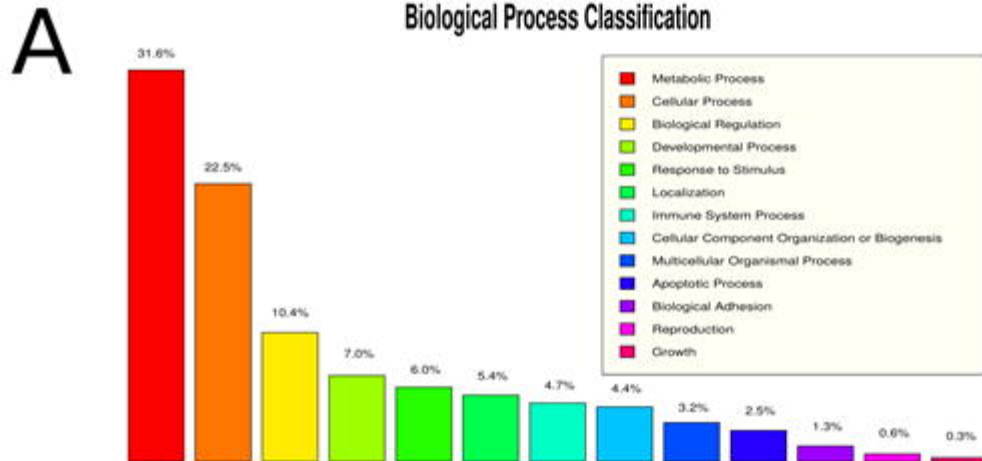

# B Cellular Component Classification

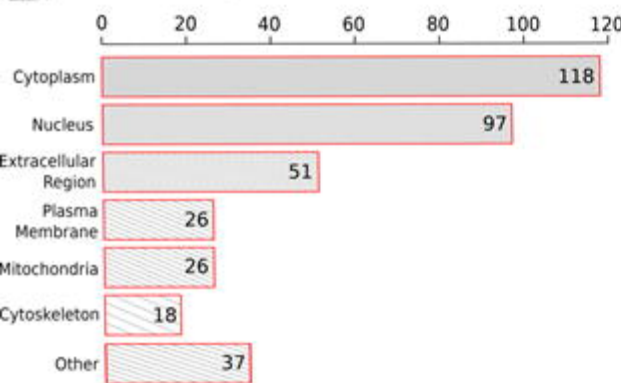

# C Molecular Function Classification

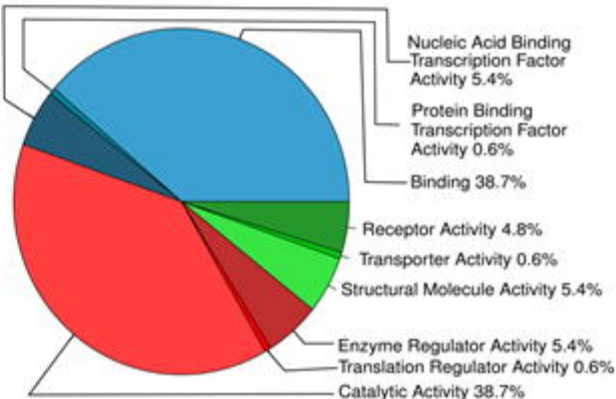

# Zika Virus Particle

# Zika Virus Proteins

# Human Proteins

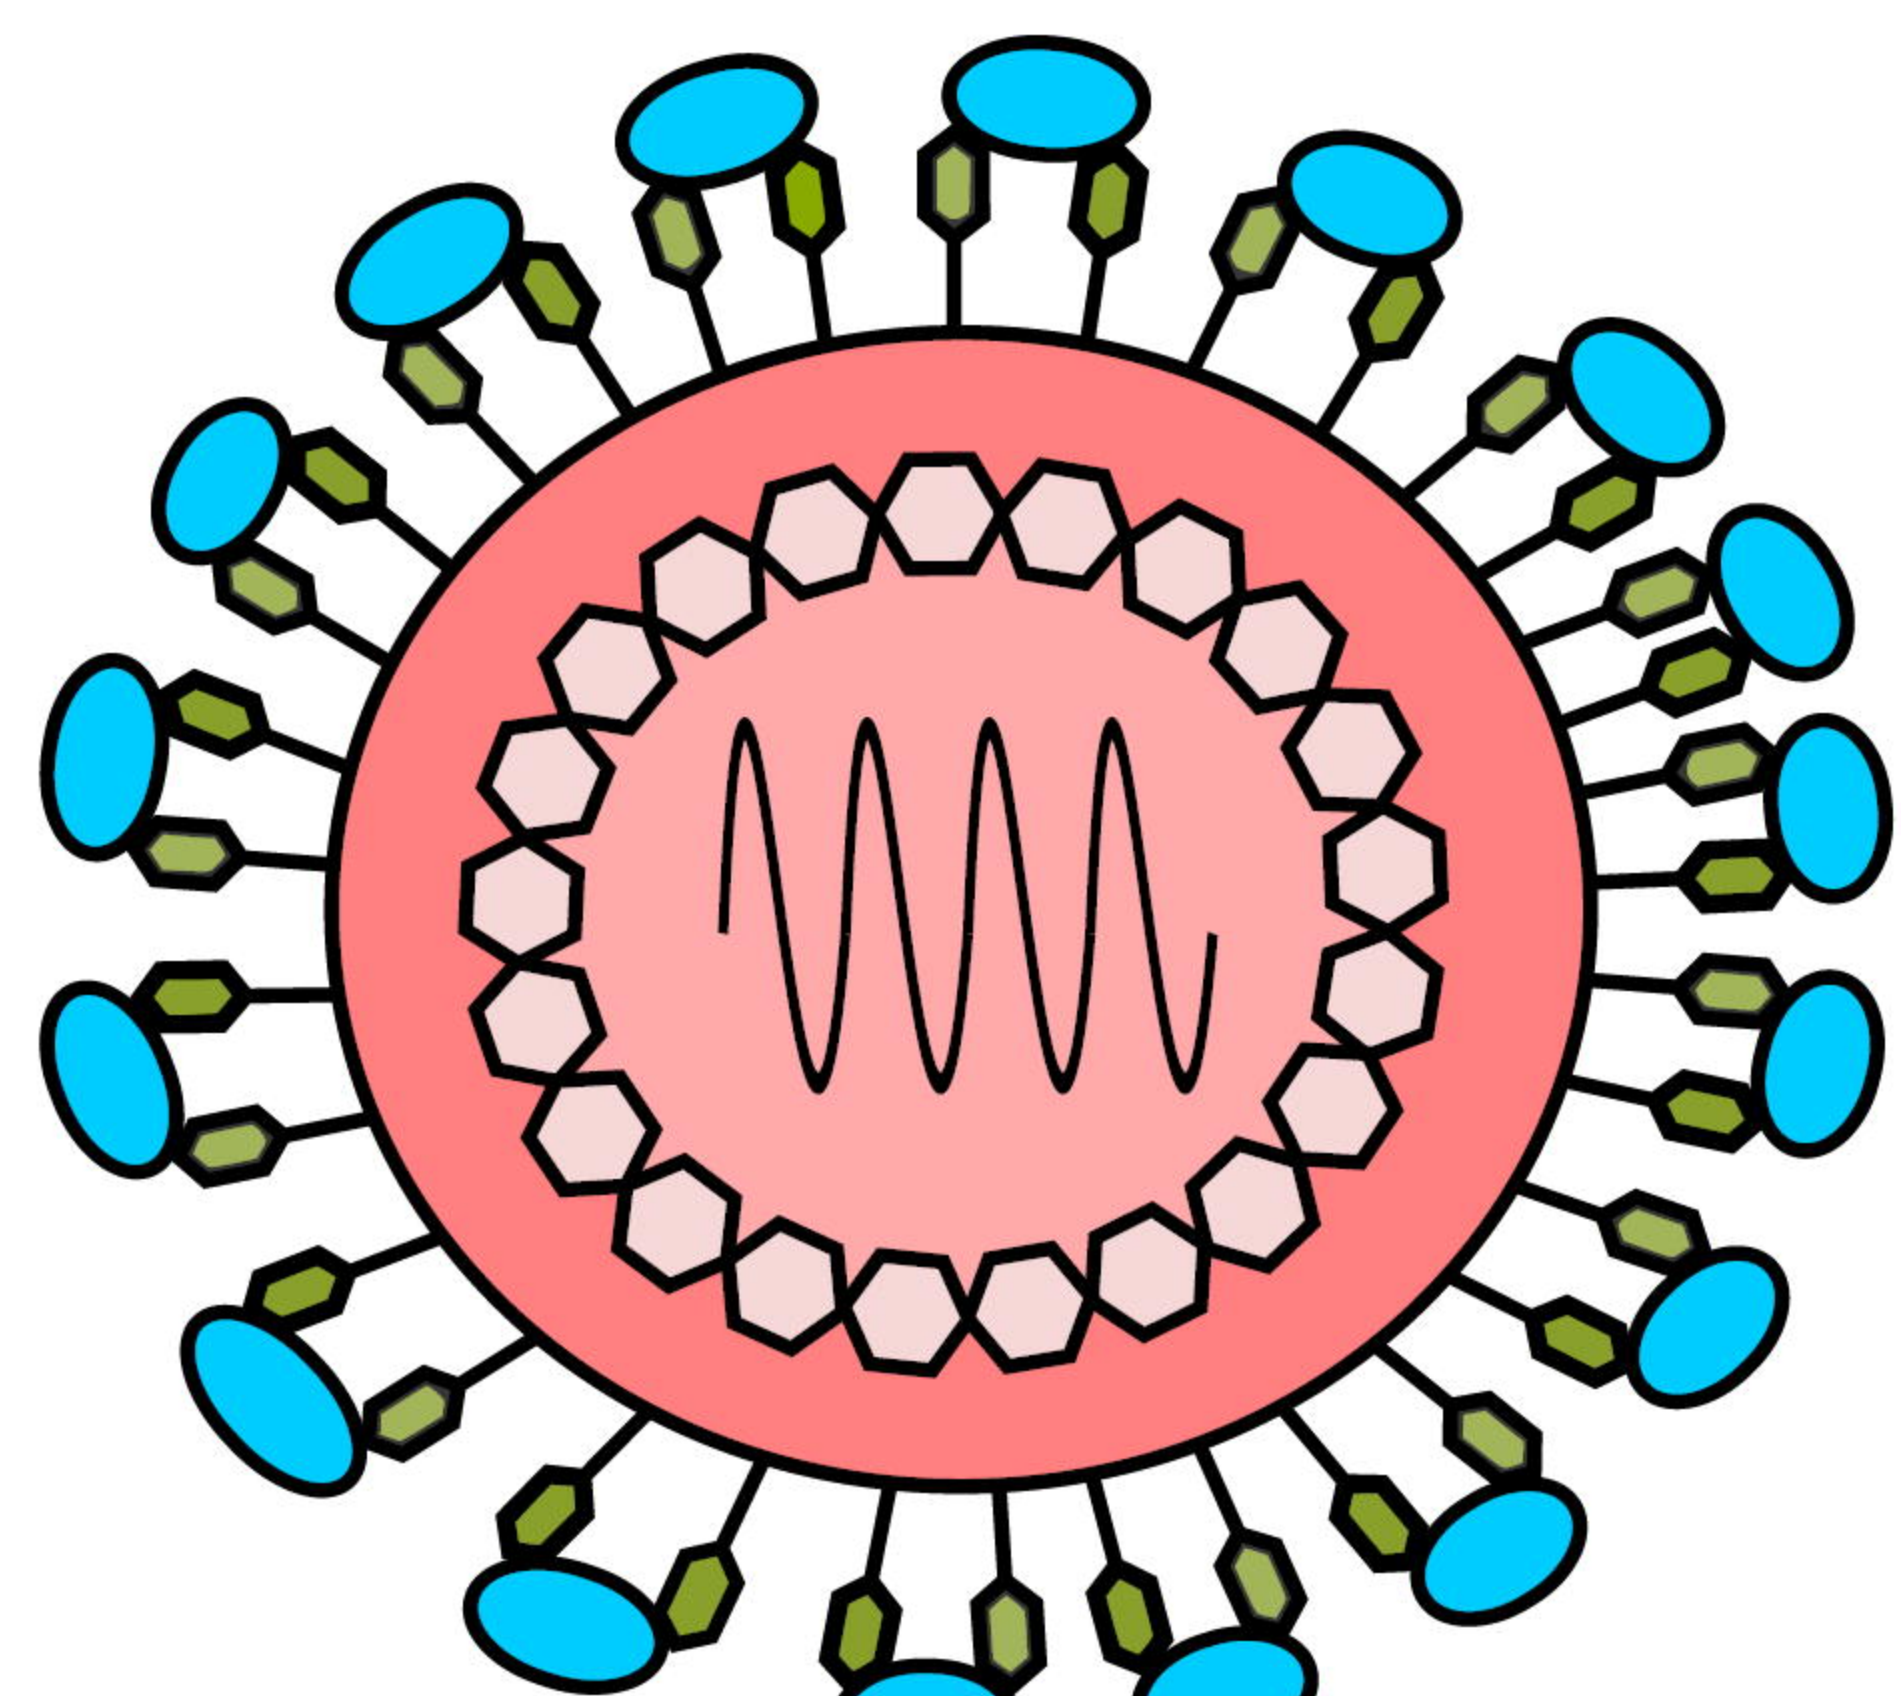

- Capsid Protein
- Envelope Protein
- Protein Pr
- Membrane Protein
- Genomic RNA
- NS1
- NS2A
- NS2B
- NS3
- NS4A
- NS4B
- NS5

- RNASET2
- CEP63
- ENO2
- TRAF4

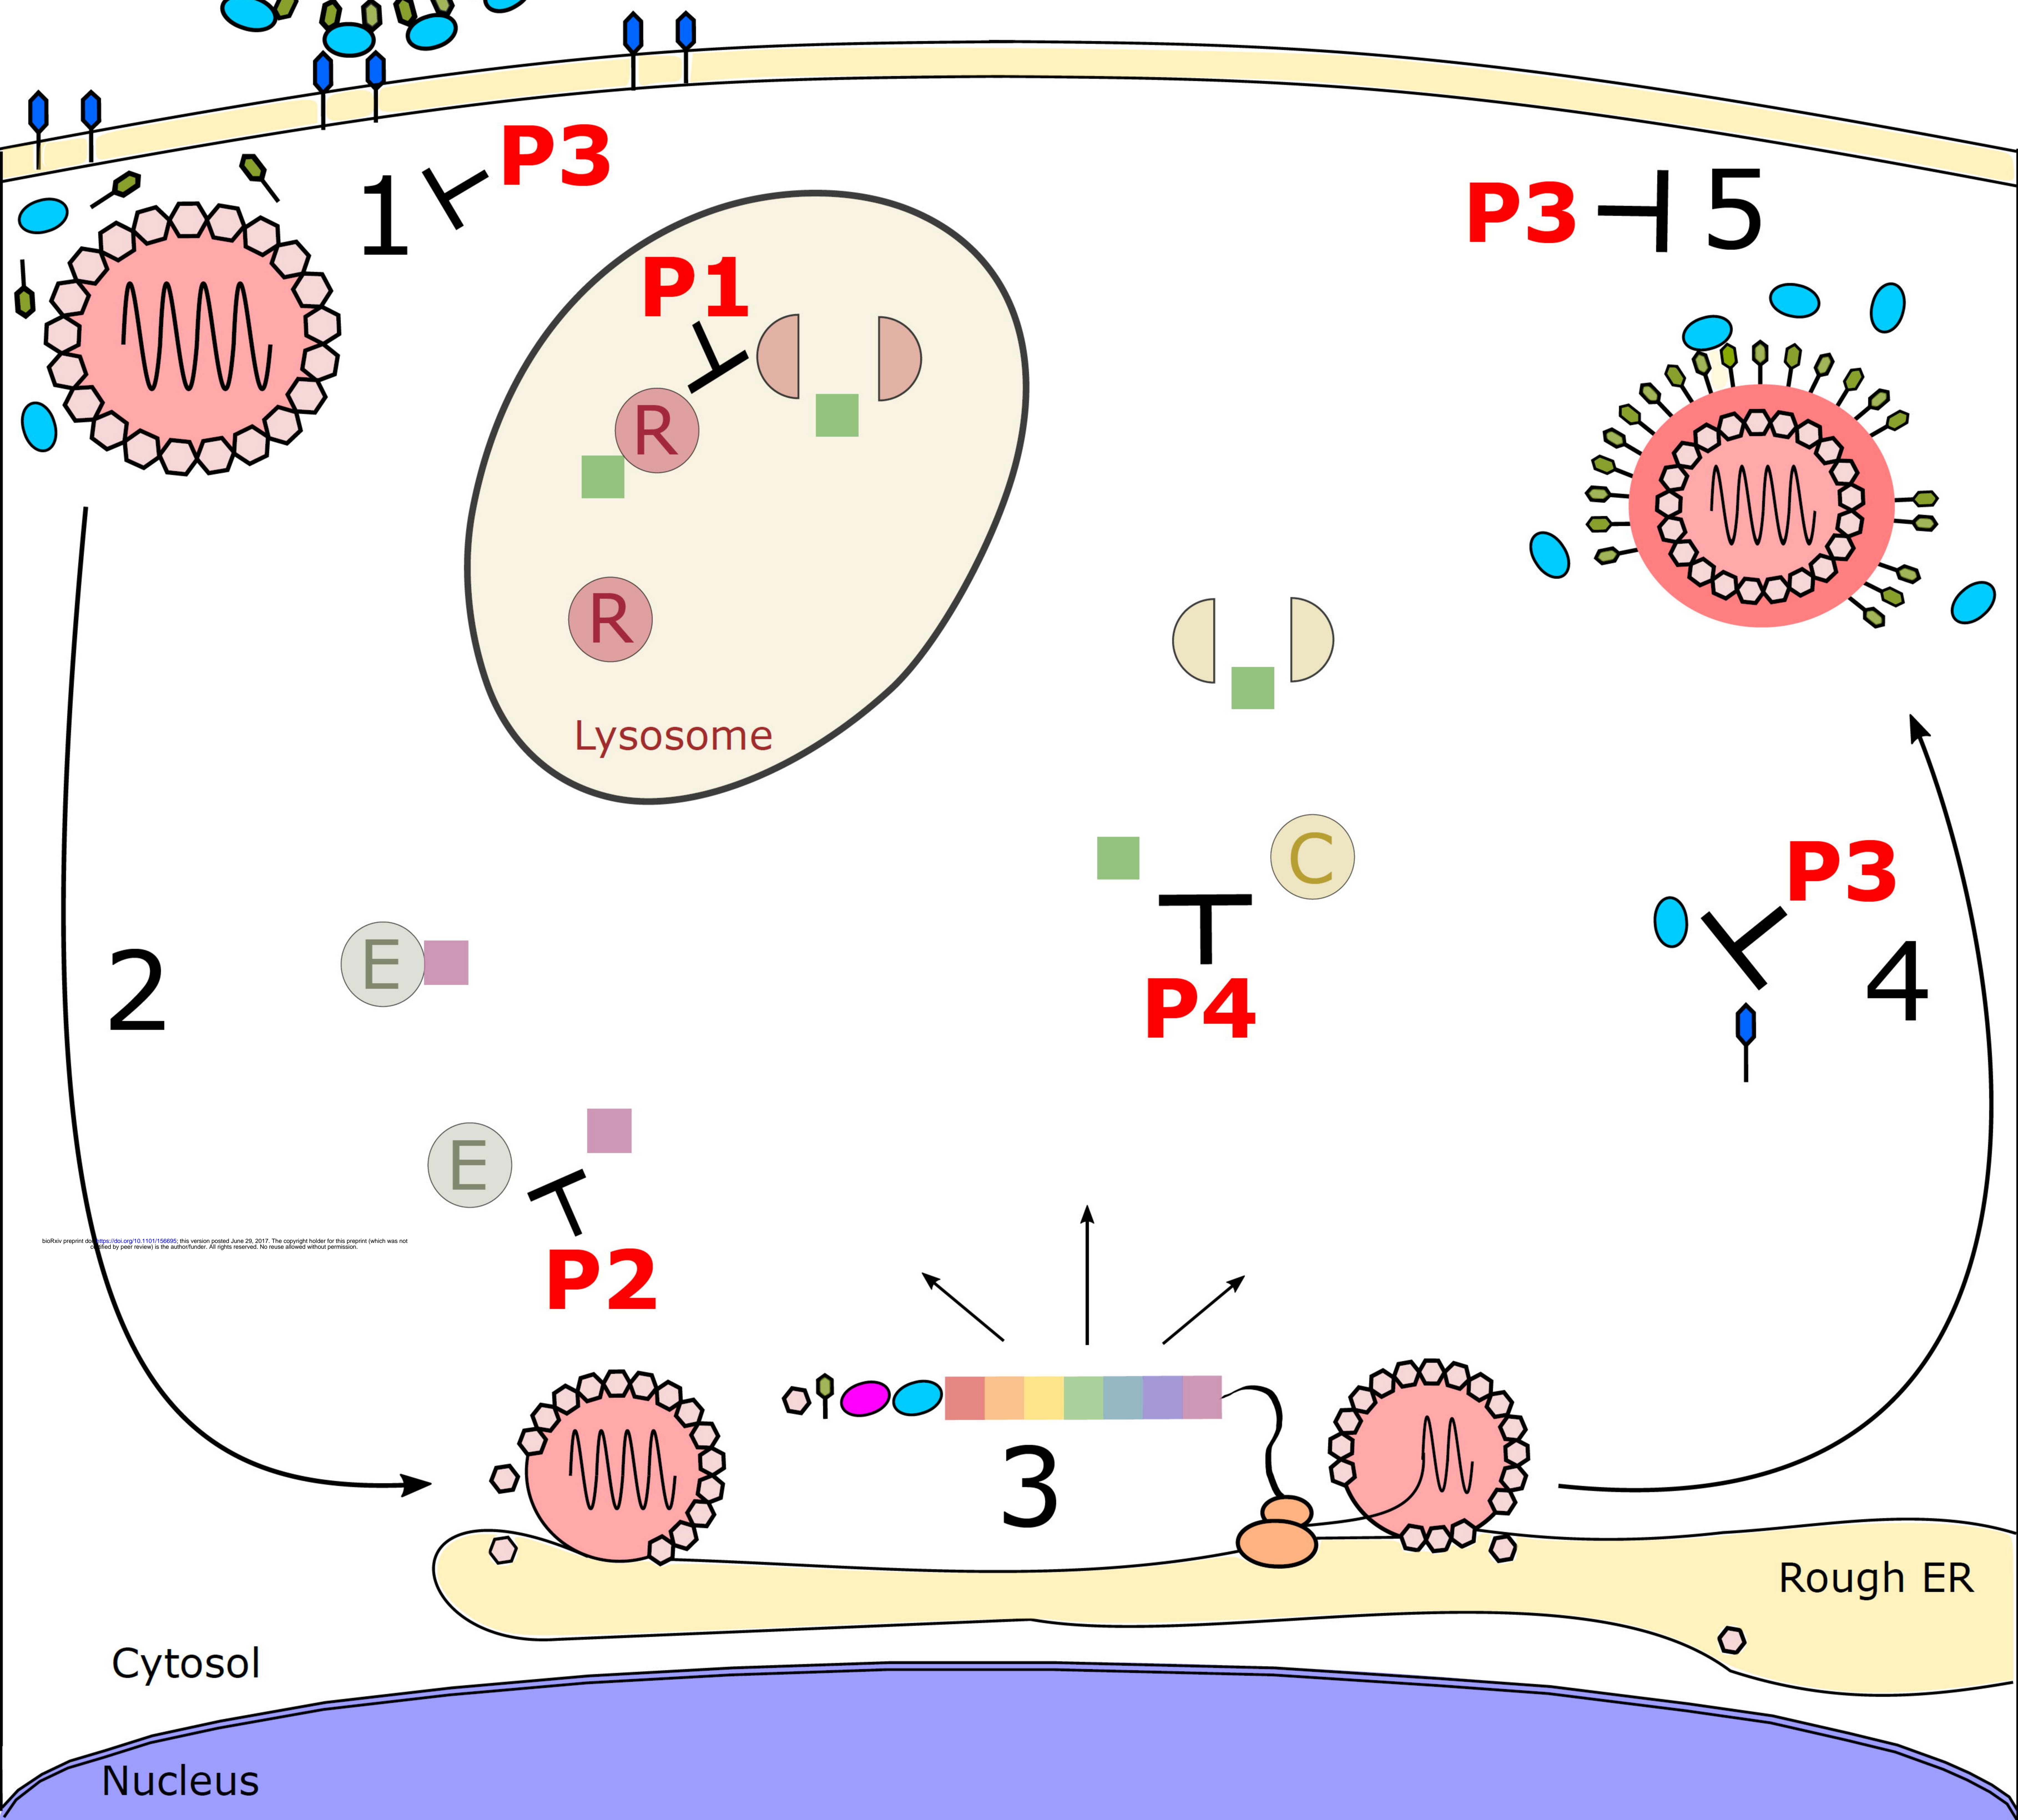

Source: https://www.biorxiv.org/content/10.1101/156695v1.full.pdf
